# Supplementary material for: Analysis of the Association between Female Medical History and Thyroid Cancer in Women: A Cross-Sectional Study Using KoGES HEXA Data
Source: MDPI journal article supplement (doi:10.3390/ijerph18158046), 2021-07-29
Supplement: s1 [file s1]

**Supplement Table S1** Analyses of the association between hysterectomy and oophorectomy

|                     | Hysterectomy  |               | P-value |
|---------------------|---------------|---------------|---------|
|                     | No            | Yes           |         |
| Oophorectomy (n, %) |               |               | <0.001* |
| No                  | 95,263 (99.2) | 10,146 (89.8) |         |
| Unilateral          | 718 (0.7)     | 697 (6.2)     |         |
| Bilateral           | 89 (0.1)      | 452 (4.0)     |         |

\*Chi-square test, Statistical significance at  $P < 0.05$
